# Supplementary material for: Intrinsically disordered regions and RNA binding domains contribute to protein enrichment in biomolecular condensates in Xenopus oocytes
Source: PubMed Central journal article supplement — Sci Rep. 2024 Nov 13;14:27890. doi: 10.1038/s41598-024-79409-9 (PMC11560939; doi:10.1038/s41598-024-79409-9), 2024-11-13
Supplement: 41598_2024_79409_MOESM9_ESM.pdf [file 41598_2024_79409_MOESM9_ESM.pdf]

## Supplementary Information

O'Connell *et al.*

|            |           |
|------------|-----------|
| Figure S1  | page 2    |
| Figure S2  | page 3    |
| Figure S3  | page 4    |
| Video S1   | page 5    |
| Video S2   | page 5    |
| Video S3   | page 6    |
| Video S4   | page 6    |
| Video S5   | page 7    |
| Video S6   | page 7    |
| Table S1   | page 8    |
| Table S2   | page 8    |
| Table S3   | pages 8-9 |
| References | page 10   |

# Supplementary Figures:

## Supplementary Figure 1

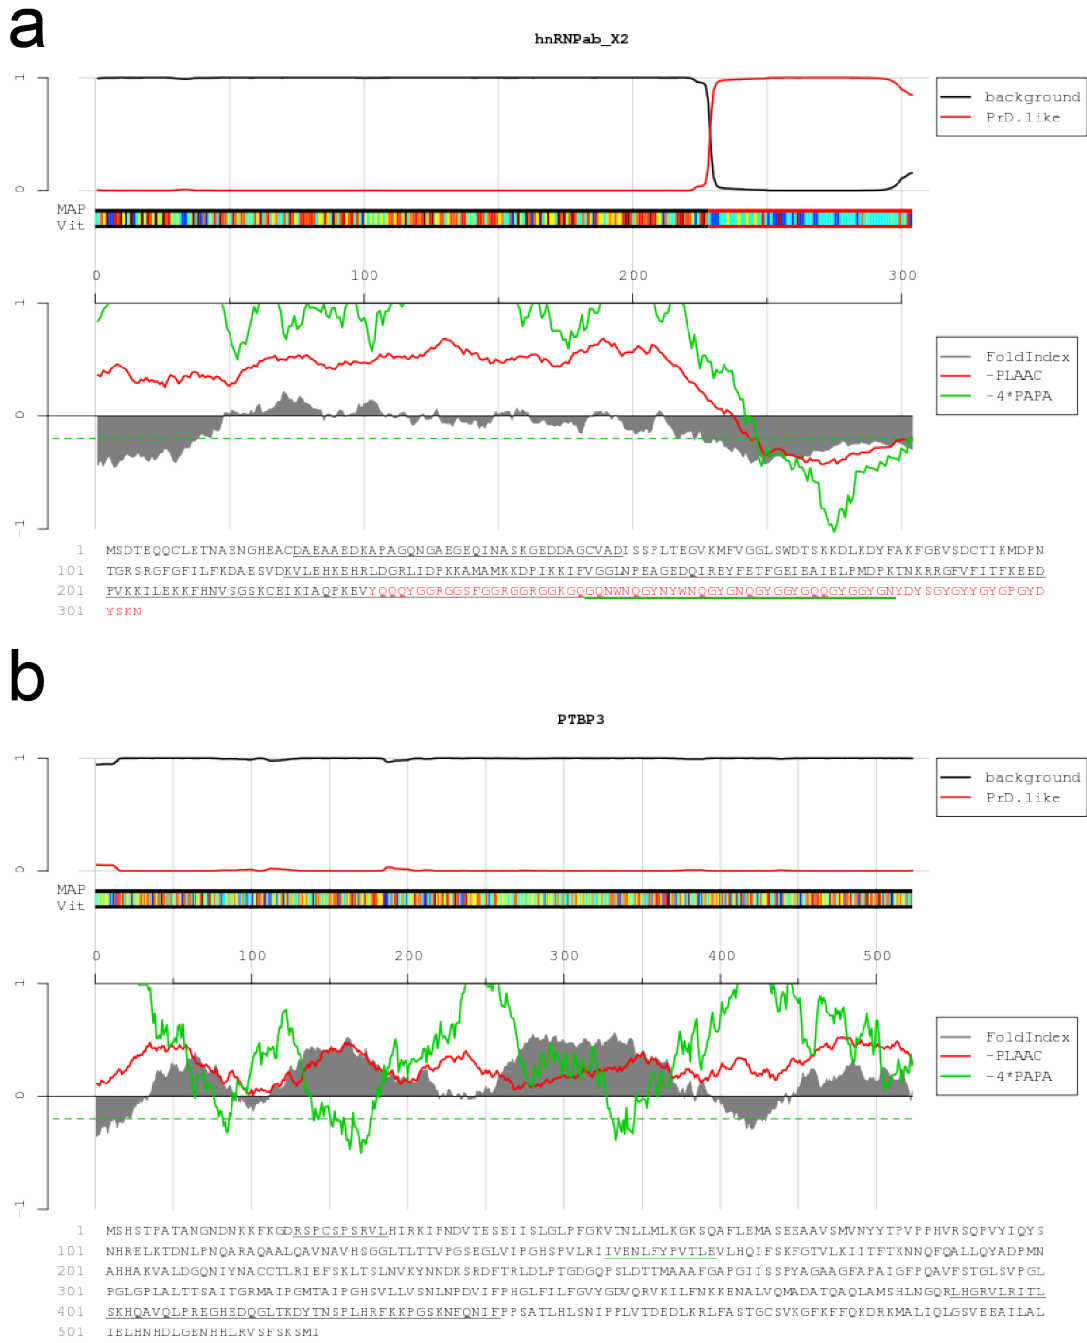

**Figure S1: PLAAC Analysis of proteins.** The protein sequences of **(a)** hnRNPAB X2 and **(b)** PTBP3 were analyzed using Prion-Like Amino Acid Composition (PLAAC)<sup>1</sup> to identify prion-

like domains. The program identified a region at the C-terminus of hnRNPAB X2 as having a high degree of prion-like character (highlighted in red). PTBP3 was not found to have significant prion-like character.

### Supplementary Figure 2

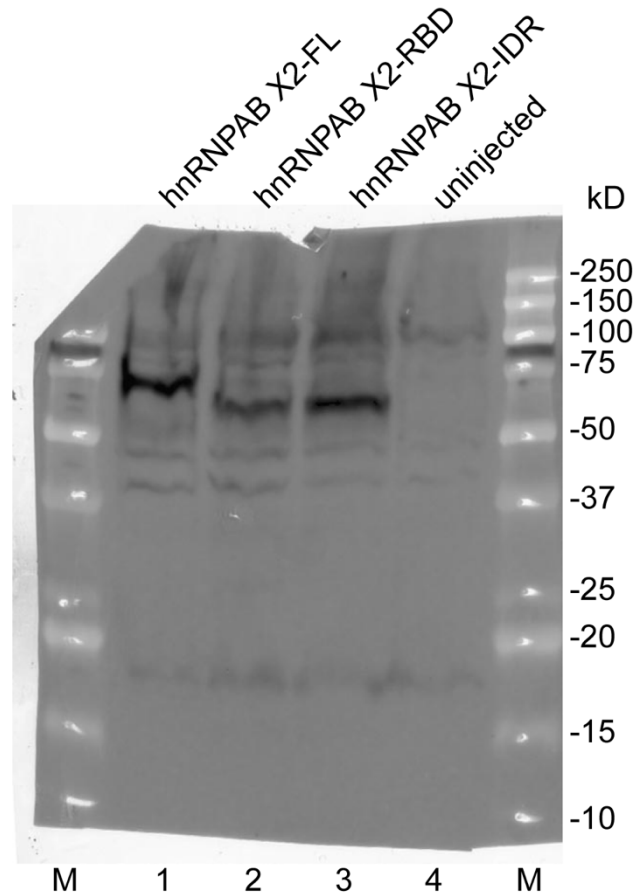

**Figure S2: Expression of hnRNPAB X2 domain constructs in oocytes.** Lysates were prepared from stage II oocytes injected with RNA transcribed from mCh-hnRNPAB X2 full-length (FL, lane 1), mCh-hnRNPAB X2-RBD (lane 2), mCh-hnRNPAB X2-IDR constructs, and uninjected control oocytes (lane 4). The constructs are diagrammed in Figure 2a. Immunoblot analysis was carried out using anti-RFP to detect the expressed proteins. The sizes (in kD) of molecular weight standards (lanes M) are indicated at the right.

Supplementary Figure 3

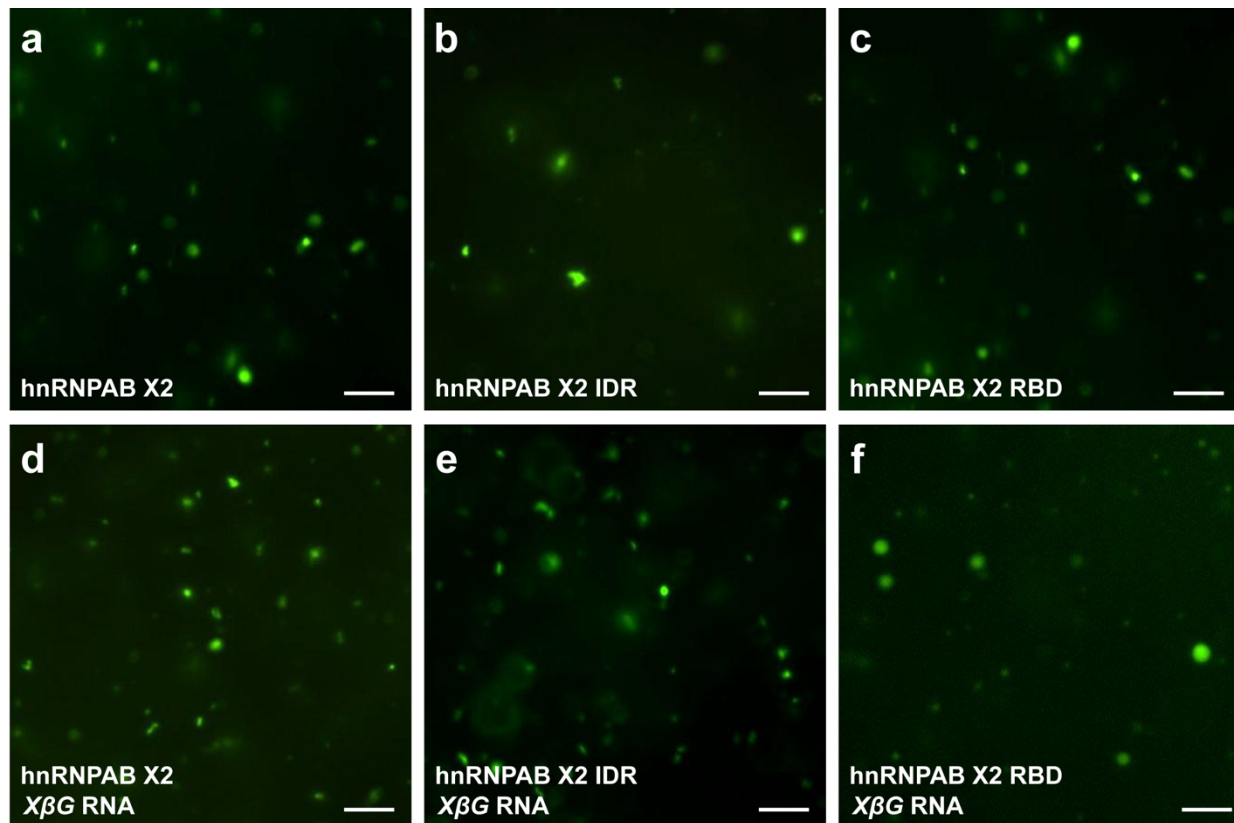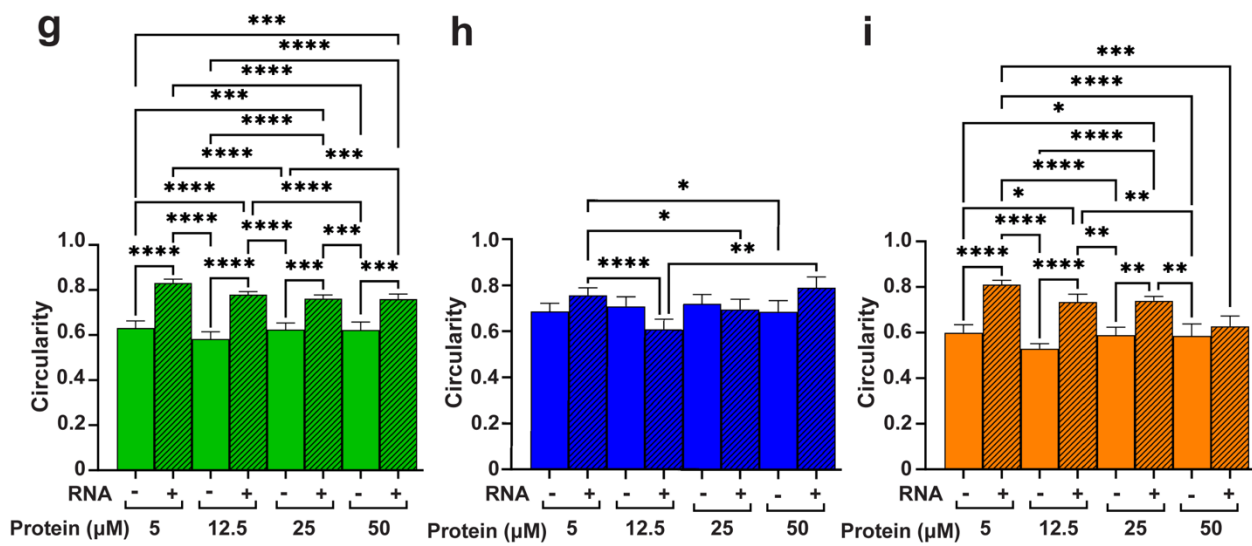

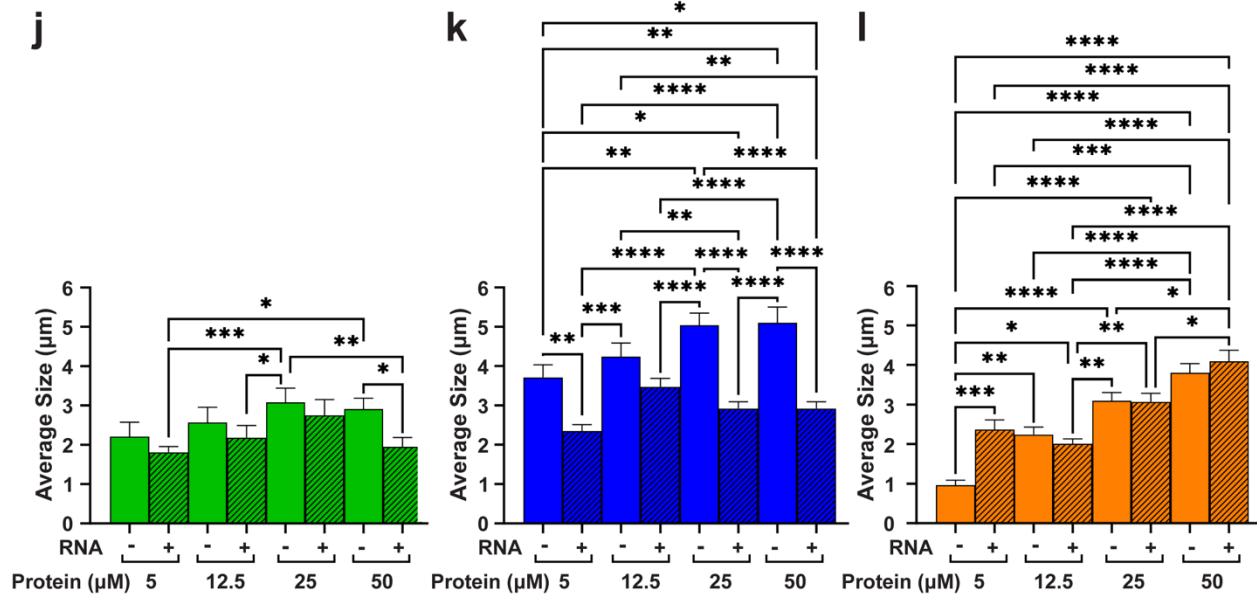

**Figure S3: Quantitation of hnRNPAB X2 condensates formed *in vitro*.** (a-f) Fluorescent micrographs of (a, d) full-length hnRNPA2 X2, (b, e) hnRNPAB X2 IDR, and (c, f) hnRNPAB X2 RBD proteins at 12.5 µM in 20 mM NaPi, pH 7.4, 150 mM NaCl, 10% PEG, in the absence (a-c) or the presence (d-f) of 0.25 mg/mL *Xenopus* β-globin (*XβG*) RNA. After cleavage of the MBP tags with TEV protease, phase separation was carried out the presence of 25 µM Thioflavin T for fluorescent labeling. Images are representative from three or more biological replicates (with independently expressed and purified protein) and three or more technical replicates. Scale bars=10 µm. (g-i) Circularity of the condensates was analyzed using the ImageJ Analyze Particles plugin on a scale of 0-1.0 arbitrary units, with 1.0 representing a perfect circle, for (g) full-length hnRNPA2 X2 (green), (h) hnRNPAB X2 IDR (blue), and (i) hnRNPAB X2 RBD (orange) at 5, 12.5, 25, and 50 µM protein concentrations in the presence (+RNA, hatched bars) and absence (-RNA, open bars) of 0.25 mg/mL *Xenopus* β-globin RNA. (j-l) Average size (in µm) of the condensates was determined using the ImageJ Analyze Particles plugin for (j) full-length hnRNPA2 X2 (green), (k) hnRNPAB X2 IDR (blue), and (l) hnRNPAB X2 RBD (orange) at 5, 12.5, 25, and 50 µM protein concentrations in the presence (+RNA, hatched bars) and absence (-RNA, open bars) of 0.25 mg/mL *Xenopus* β-globin RNA. (g-l) Error bars represent standard error of the mean, \*\*\*\* indicates  $p < 0.0001$ , \*\*\* indicates  $p < 0.001$ , \*\* indicates  $p < 0.01$ , \* indicates  $p < 0.05$ , and all brackets not shown are not significant ( $p > 0.05$ ). Statistics shown are an ordinary two-way ANOVA followed by Tukey's multiple comparisons.

## Supplementary Video Legends:

**Videos S1: Time-lapse video of hnRNPAB X2 RBD condensates.** Condensates were formed at room temperature by incubation of 50  $\mu$ M hnRNPAB X2 RBD in 20 mM NaPi, pH 7.4, 150 mM NaCl, followed by treatment with 0.03 mg/ml TEV protease. Condensates were imaged on a Nikon Ti2-E Fluorescence microscope, using a 20 $\times$  objective, with frames collected every 0.6 sec. Shown are videos of hnRNPAB X2 RBD condensates (a) fusing and (b) wetting the slide, beginning 20 min. after TEV addition; the display rate is 7 frames per sec.

**Videos S2: Time-lapse video of hnRNPAB X2 RBD condensates in the presence of RNA.** Condensates were formed at room temperature by incubation of 50  $\mu$ M hnRNPAB X2 RBD with 0.25 mg/mL *Xenopus*  $\beta$ -globin RNA in 20 mM NaPi, pH 7.4, 150 mM NaCl, followed by treatment with 0.03 mg/ml TEV protease. Condensates were imaged on a Nikon Ti2-E Fluorescence microscope, using a 20 $\times$  objective, with frames collected every 0.6 sec. Shown are videos of hnRNPAB X2 RBD condensates (a) fusing and (b) wetting the slide, beginning 20 min. after TEV addition; the display rate is 7 frames per sec.

**Video S3: Time-lapse video of hnRNPAB X2 condensates.** Condensates were formed at room temperature by incubation of 50  $\mu$ M hnRNPAB X2 in 20 mM NaPi, pH 7.4, 150 mM NaCl, followed by treatment with 0.03 mg/ml TEV protease. Condensates were imaged on a Nikon Ti2-E Fluorescence microscope, using a 20 $\times$  objective, with frames collected every 0.6 sec. Shown are videos of hnRNPAB X2 condensates, beginning 20 min. after TEV addition; the display rate is 7 frames per sec.

**Video S4: Time-lapse video of hnRNPAB X2 condensates in the presence of RNA.** Condensates were formed at room temperature by incubation of 50  $\mu$ M hnRNPAB X2 with 0.25 mg/mL *Xenopus*  $\beta$ -globin RNA in 20 mM NaPi, pH 7.4, 150 mM NaCl, followed by treatment with 0.03 mg/ml TEV protease. Condensates were imaged on a Nikon Ti2-E Fluorescence microscope, using a 20 $\times$  objective, with frames collected every 0.6 sec. Shown are videos of hnRNPAB X2 condensates, beginning 20 min. after TEV addition; the display rate is 7 frames per sec.

**Video S4: Time-lapse video of hnRNPAB X2 IDR condensates.** Condensates were formed at room temperature by incubation of 50  $\mu$ M hnRNPAB X2 IDR in 20 mM NaPi, pH 7.4, 150 mM NaCl, followed by treatment with 0.03 mg/ml TEV protease. Condensates were imaged on a Nikon Ti2-E Fluorescence microscope, using a 20 $\times$  objective, with frames collected every 0.6 sec. Shown are videos of hnRNPAB X2 IDR condensates, beginning 20 min. after TEV addition; the display rate is 7 frames per sec.

**Video S6: Time-lapse video of hnRNPAB IDR condensates in the presence of RNA.** Condensates were formed at room temperature by incubation of 50  $\mu$ M hnRNPAB IDR with 0.25 mg/mL *Xenopus*  $\beta$ -globin RNA in 20 mM NaPi, pH 7.4, 150 mM NaCl, followed by treatment with 0.03 mg/ml TEV protease. Condensates were imaged on a Nikon Ti2-E Fluorescence microscope, using a 20 $\times$  objective, with frames collected every 0.6 sec. Shown are videos of hnRNPAB X2 IDR condensates, beginning 20 min. after TEV addition; the display rate is 7 frames per sec.

## Supplementary Tables:

### Supplementary Table 1

| Protein Classification | % of L-body proteome | % of L-body IDR-containing proteins |
|------------------------|----------------------|-------------------------------------|
| No IDR                 | 53%                  | n/a                                 |
| Non-Prion-Like IDR     | 17%                  | 37%                                 |
| Prion-Like IDR         | 29%                  | 63%                                 |

**Table S1:** Survey of L-body proteome for prion-like character. Using the L-body proteome<sup>1</sup> ( $n=86$  proteins), L-body protein sequences available in Xenbase<sup>2</sup> were analyzed using PLAAC<sup>1</sup> to identify predicted IDRs and prion-like character. Proteins were rated as either having no IDR, a prion-like IDR, or a non-prion-like IDR, and percentages of the L-body proteome as a whole were generated based on these counts.

### Supplementary Table 2

| Antibody                      | Source                     |
|-------------------------------|----------------------------|
| Rabbit polyclonal anti-RFP    | Abcam (ab62341)            |
| Rabbit polyclonal anti-40LoVe | K. Czaplinski <sup>3</sup> |
| Goat anti-rabbit AF546        | Thermofisher (11010)       |

**Table S2:** Antibodies used in this study. The name of the antibody and the antigen are specified on the left, and the source is shown on the right.

### Supplementary Table 3

| Primer                    | Sequence                                                       |
|---------------------------|----------------------------------------------------------------|
| X2AB_FL_Fwd_GibsonCherry  | GTACAAGAGATCTGATCATGCCATGGGGCCCATG<br>TCCGACACCGAGCAGC         |
| X2AB_RBD_Fwd_GibsonCherry | GTACAAGAGATCTGATCATGCCATGGGGCCCAA<br>ATGTTTGTGGTGGCTTGAGCTG    |
| X2AB_IDR_Fwd_GibsonCherry | GTACAAGAGATCTGATCATGCCATGGGGCCCAA<br>GAAGTGTATCAGCAACAGTATGGCG |



|                               |                                                                                        |
|-------------------------------|----------------------------------------------------------------------------------------|
| X2AB_FL_Rev_GibsonCherrySpel  | GTTTAGTGGTAACCAGATCCTAGTCAGTCATCAGT<br>TTTTACTGTAGTCATAGCCTGGTCC                       |
| X2AB_RBD_Rev_GibsonCherrySpel | GTTTAGTGGTAACCAGATCCTAGTCAGTCATGGTT<br>GTGCAATCTTTATCTCACACTTGC                        |
| hnRNPAB_PYNull_Cherry_Rev     | GTTTAGTGGTAACCAGATCCTAGTCAGTCATCACT<br>TGAGTTATTCTGGTGGCTCCCAC                         |
| X2AB_FL_Fwd                   | TCCGACACCGAGCAGCAGTGTCTAGAA                                                            |
| X2AB_FL_Rev                   | GTTCTTACTGTAGTCATAGCCTGGTCCATATCCAT<br>AATAG                                           |
| X2AB_RBD_Fwd                  | AAAATGTTTGTGGTGGCTTGAGCTGG                                                             |
| X2AB_RBD_Rev                  | TGGTTGTGCAATCTTTATCTCACACTTG                                                           |
| X2AB_IDR_Fwd                  | AAAGAAGTGTATCAGCAACAGTATGGCGG                                                          |
| P3_IDR_Fwd                    | GTACAAGAGATCTGATCATGCCATGGGGCCCATG<br>AGCCATTCCACTCCAGCTACAG                           |
| P3_IDR_Rev                    | CAGAGACAGAGACAGAGACAGAGAGATCATCGAT<br>TTGGAGAAAGAGACACG                                |
| XBM_Fwd                       | <u>GAAATTAATACGACTCACTATAGGGAGAGTTGAAC</u><br>TTGTAGCATCCAGCTCAGAATAAACGCTCAACTTT<br>G |
| XBM_Rev                       | GGATCCACATGTAGGGTCTCT                                                                  |
| Vg1_qPCR_Fwd                  | GGTATCTCCTCCTCCTGTCCCT                                                                 |
| Vg1_qPCR_Rev                  | TGGGTGGATGTCATCGGAGT                                                                   |
| CanAB_qPCR_Fwd                | GGCTATTATGGATATGGACCAG                                                                 |
| X2AB_qPCR_Fwd                 | ACAATTACTGGAACCAGGGCT                                                                  |
| CanAB_qPCR_Rev                | GGCTATTATGGATATGGACCAG                                                                 |
| X2AB_qPCR_Rev                 | GTTTTTACTGTAGTCATAGCCTG                                                                |

**Table S3:** Primers used in this study. All Forward (Fwd) and Reverse (Rev) primers are listed from 5' to 3'. The following abbreviations are used: X2AB (hnRNPAB X2), FL (full-length), P3 (PTBP3), XBM (*Xenopus*  $\beta$  globin), and CanAB (canonical hnRNPAB). XBM\_Fwd contains a T7 promoter sequence (underlined).

## Supplementary References:

1. Lancaster, A. K., Nutter-Upham, A., Lindquist, S. & King, O. D. PLAAC: a web and command-line application to identify proteins with prion-like amino acid composition. *Bioinformatics* **30**, 2501–2502 (2014).
2. Fisher, M. *et al.* Xenbase: key features and resources of the *Xenopus* model organism knowledgebase. *Genetics* **244**, iyad018 (2023).
3. Czaplinski, K. & Mattaj, I. W. 40LoVe interacts with Vg1RBP/Vera and hnRNP I in binding the Vg1-localization element. *RNA (New York, N.Y.)* **12**, 213–222 (2006).
